# Supplementary material for: Spatiotemporal dynamics and epidemiological impact of SARS-CoV-2 XBB lineages dissemination in Brazil in 2023
Source: bioRxiv or medRxiv preprint supplement (doi:10.1101/2023.10.30.23297466), 2023-10-31
Supplement: Supplementary file [file media-1.pdf]

## SUPPLEMENTARY MATERIAL

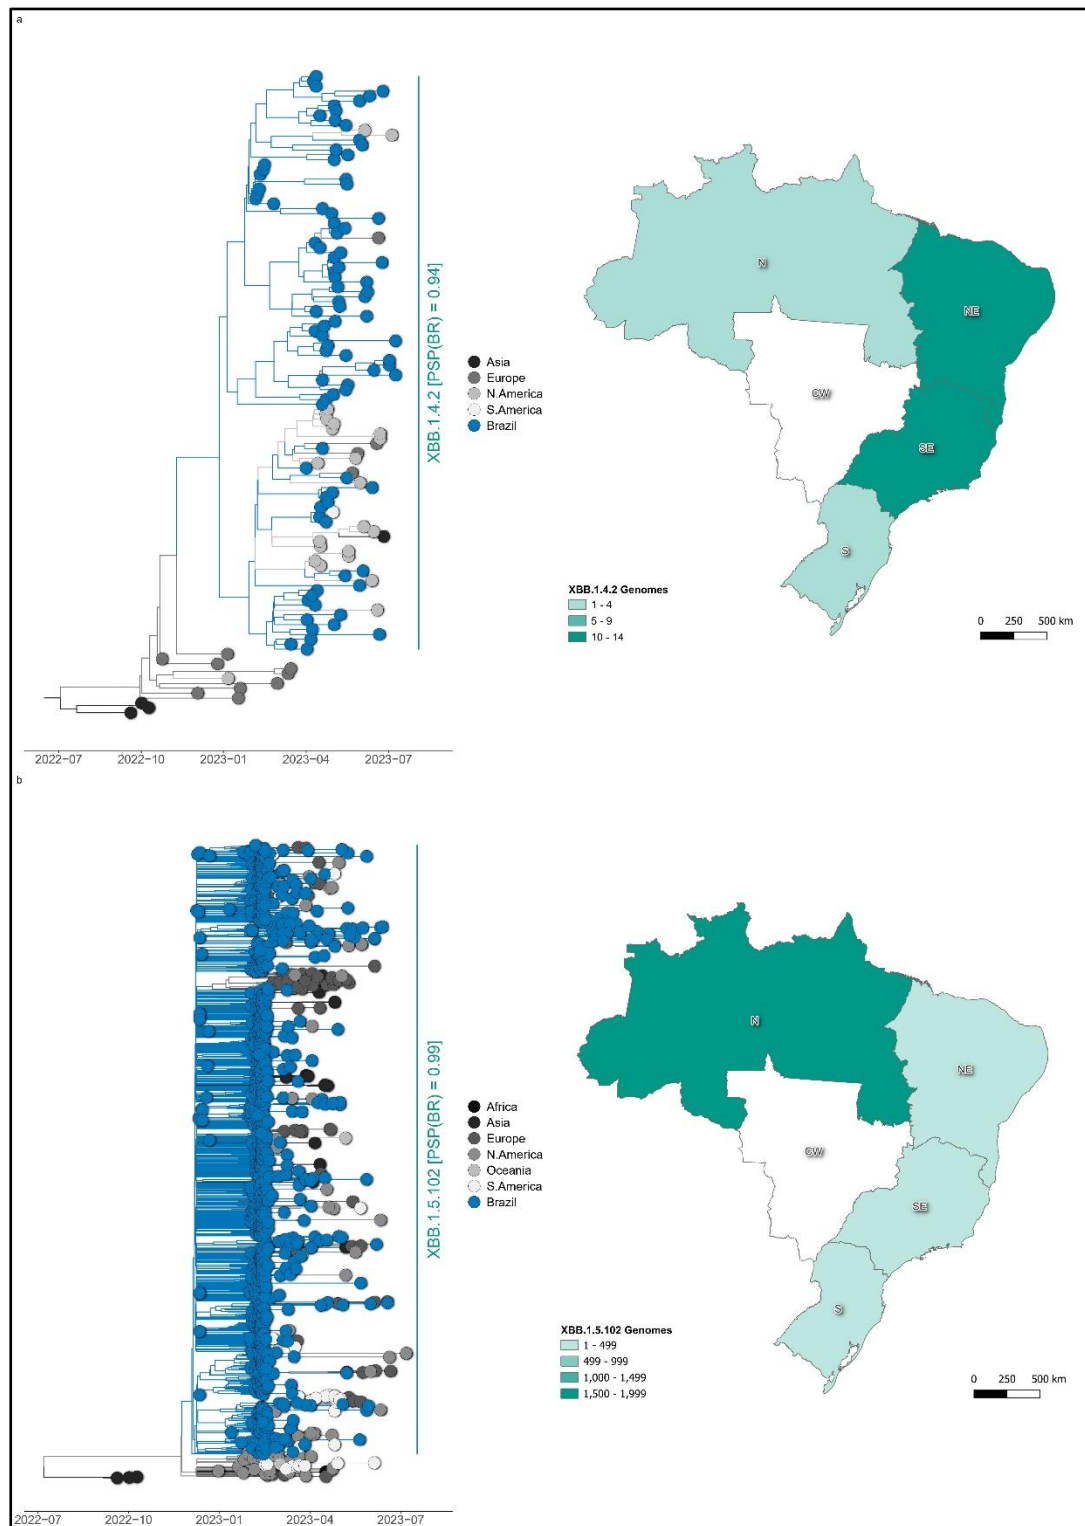

**Supplementary Figure 1: Time-scaled phylogeographic trees of SARS-CoV-2 XBB\* lineages. a.** XBB.1.4.2 ( $n = 131$ ), **b.** XBB.1.5.102 ( $n = 1,274$ ). The trees are colored in accordance with the reconstructed location of their internal nodes and following the color code on the right side of each panel. Key lineages in each tree are named by labels on the right side of each panel, which also contains their posterior state probability of emergence in Brazil. Each of these trees is accompanied by maps illustrating their prevalence across Brazil's five geographical regions: N (North), NE (Northeast), CW (Central-West), SE (Southeast), and S (South). Maps were generated with QGIS v.3.10.2 software (<http://qgis.org>) using public access data downloaded from the GADM v.3.6 database (<https://gadm.org>) and shapefiles obtained from the Brazilian Institute of Geography and Statistics (<https://portaldemapas.ibge.gov.br/portal.php#homepage>).

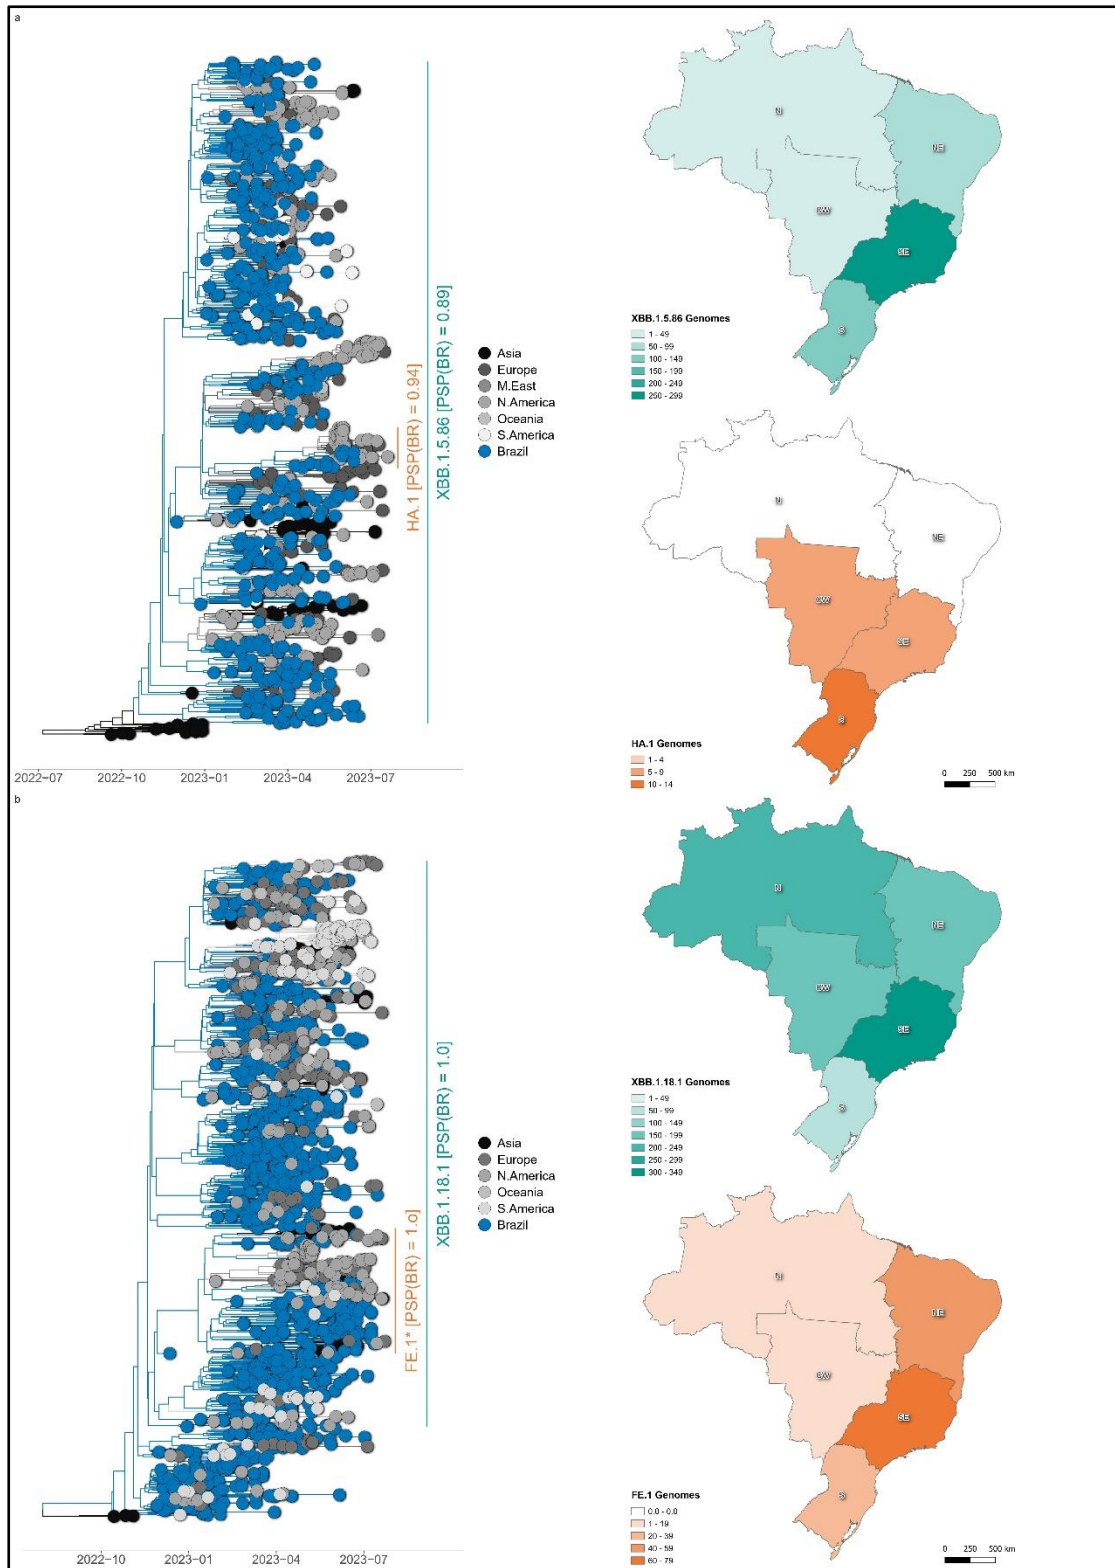

**Supplementary Figure 2: Time-scaled phylogeographic trees of SARS-CoV-2 XBB\* lineages. a.** XBB.1.5.86/HA.1 ( $n = 991$ ), **b.** XBB.1.18.1/FE.1 ( $n = 1,544$ ). The trees are colored in accordance with the reconstructed location of their internal nodes and following the color code on the right side of each panel. Key lineages in each tree are named by labels on the right side of each panel, which also contains their posterior state probability of emergence in Brazil. Each of these trees is accompanied by maps illustrating their prevalence across Brazil's five geographical regions: N (North), NE (Northeast), CW (Central-West), SE (Southeast), and S (South). Maps were generated with QGIS v.3.10.2 software (<http://qgis.org>) using public access data downloaded from the GADM v.3.6 database (<https://gadm.org>) and shapefiles obtained from the Brazilian Institute of Geography and Statistics (<https://portal demapas.ibge.gov.br/portal.php#homepage>).

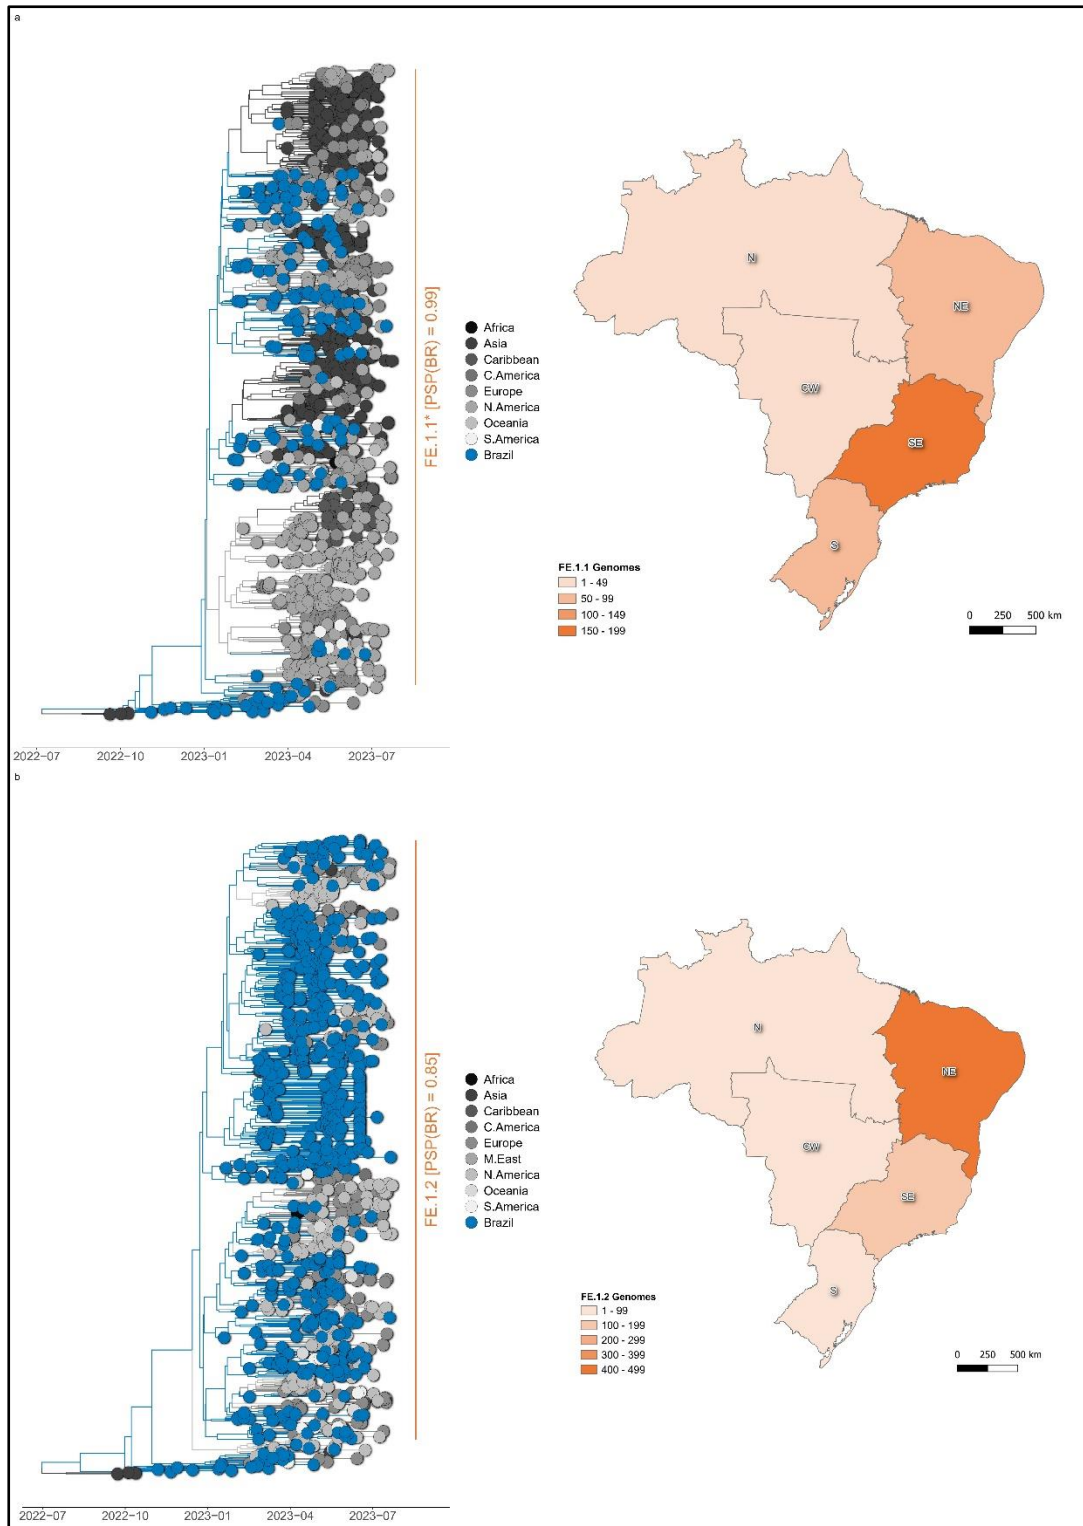

**Supplementary Figure 3: Time-scaled phylogeographic trees of SARS-CoV-2 XBB\* lineages. a.** FE.1.1 ( $n = 1,251$ ), **b.** FE.1.2 ( $n = 1,047$ ). The trees are colored in accordance with the reconstructed location of their internal nodes and following the color code on the right side of each panel. Key lineages in each tree are named by labels on the right side of each panel, which also contains their posterior state probability of emergence in Brazil. Each of these trees is accompanied by maps illustrating their prevalence across Brazil's five geographical regions: N (North), NE (Northeast), CW (Central-West), SE (Southeast), and S (South). Maps were generated with QGIS v.3.10.2 software (<http://qgis.org>) using public access data downloaded from the GADM v.3.6 database (<https://gadm.org>) and shapefiles obtained from the Brazilian Institute of Geography and Statistics (<https://portal demapas.ibge.gov.br/portal.php#homepage>).

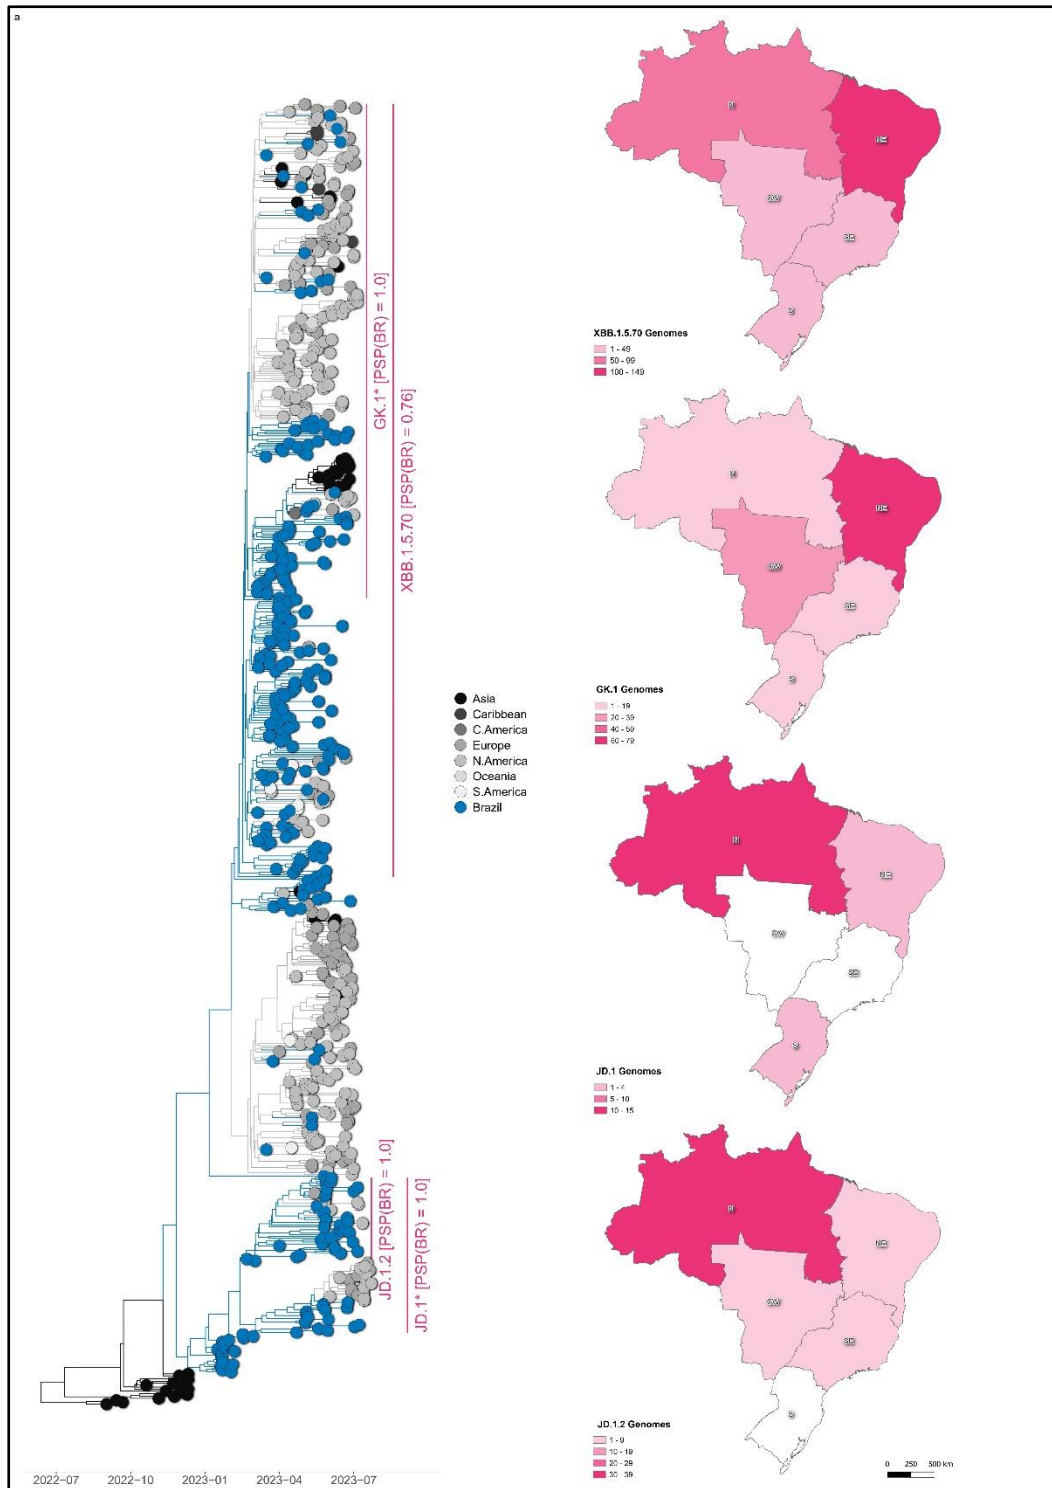

**Supplementary Figure 4: Time-scaled phylogeographic trees of SARS-CoV-2 XBB\* lineages. a.** XBB.1.5.70/GK.1\*/JD.1\*/JD.1.2 ( $n = 691$ ). The tree is colored in accordance with the reconstructed location of its internal nodes and following the color code on the right side of the panel. Key lineages in each tree are named by labels on the right side of each panel, which also contains their posterior state probability of emergence in Brazil. Each of these trees is accompanied by maps illustrating their prevalence across Brazil's five geographical regions: N (North), NE (Northeast), CW (Central-West), SE (Southeast), and S (South). Maps were generated with QGIS v.3.10.2 software (<http://qgis.org>) using public access data downloaded from the GADM v.3.6 database (<https://gadm.org>) and shapefiles obtained from the Brazilian Institute of Geography and Statistics (<https://portaldemapas.ibge.gov.br/portal.php#homepage>).

**Supplementary Table 1: Major Brazilian SARS-CoV-2 Omicron XBB\* lineages.**

| <b>XBB Group</b>       | <b>Pango Lineage</b>        | <b>N</b> | <b>Sampling Range</b>     | <b>T<sub>MRCA</sub> (95% HPD)</b>     | <b>aLRT</b> | <b>Root (PSP)</b> |
|------------------------|-----------------------------|----------|---------------------------|---------------------------------------|-------------|-------------------|
| XBB*+F486P             | XBB.1.5.102                 | 1,226    | 2022-12-09/<br>2022-07-08 | 2022-12-03<br>(2022-11-22/2022-12-08) | 0.89        | BR (0.99)         |
|                        | XBB.1.18.1                  | 936      | 2022-11-10/<br>2023-07-16 | 2022-10-17<br>(2022-10-02/2022-10-28) | 0.85        | BR (1.0)          |
|                        | XBB.1.5.86                  | 877      | 2022-12-01/<br>2023-07-15 | 2022-11-05<br>(2022-10-13/2022-11-22) | 0.83        | BR (0.89)         |
|                        | XBB.1.4.2                   | 118      | 2023-02-05/<br>2023-07-10 | 2022-12-29<br>(2022-11-30/2023-01-21) | 0.94        | BR (0.94)         |
| XBB*+F486P+F456L       | FE.1<br>(XBB.1.18.1.1)      | 152      | 2023-01-26/<br>2023-07-17 | 2022-12-12<br>(2022-11-24/2022-12-25) | 1.0         | BR (1.0)          |
|                        | FE.1.1<br>(XBB.1.18.1.1.1)  | 1,193    | 2023-02-02/<br>2023-07-24 | 2022-12-18<br>(2022-11-26/2023-01-04) | 0.89        | BR (0.99)         |
|                        | FE.1.2<br>(XBB.1.18.1.1.2)  | 990      | 2022-01-16/<br>2023-07-21 | 2022-12-21<br>(2022-12-04/2023-01-04) | 0.85        | BR (1.0)          |
|                        | HA.1<br>(XBB.1.5.86.1)      | 60       | 2023-04-10/<br>2023-07-21 | 2023-01-24<br>(2023-01-07/2023-02-13) | 0.85        | BR (0.94)         |
| XBB*+F486P+F456L+L455F | XBB.1.5.70                  | 214      | 2023-03-24/<br>2023-07-21 | 2023-02-14<br>(2023-01-30/2023-02-27) | 1.0         | BR (0.76)         |
|                        | GK.1<br>(XBB.1.5.70.1)      | 148      | 2023-03-24/<br>2023-07-22 | 2023-03-09<br>(2023-03-03/2023-03-15) | 0.78        | BR (1.0)          |
|                        | GK.1.1<br>(XBB.1.5.70.1.1)  | 36       | 2023-05-09/<br>2023-07-20 | 2023-04-06<br>(2023-03-18/2023-04-22) | 0.92        | BR (1.0)          |
|                        | GK.1.2<br>(XBB.1.5.70.1.2)  | 12       | 2023-05-21/<br>2023-07-18 | 2023-04-16<br>(2023-03-19/2023-05-03) | 0.93        | NA (0.90)         |
|                        | GK.1.3<br>(XBB.1.5.70.1.3)  | 67       | 2023-04-18/<br>2023-07-25 | 2023-03-19<br>(2023-03-12/2023-03-25) | 0.96        | NA (1.0)          |
|                        | GK.2<br>(XBB.1.5.70.2)      | 68       | 2023-05-05/<br>2023-07-18 | 2023-04-13<br>(2023-03-26/2023-04-28) | 0.91        | NA (0.70)         |
|                        | GK.3<br>(XBB.1.5.70.3)      | 21       | 2023-05-18/<br>2023-07-02 | 2023-04-14<br>(2023-03-25/2023-04-30) | 0.87        | NA (1.0)          |
|                        | JD.1<br>(XBB.1.5.102.1)     | 19       | 2023-05-11/<br>2023-07-31 | 2023-03-02<br>(2023-02-20/2023-03-09) | 0.97        | BR (1.0)          |
|                        | JD.1.1<br>(XBB.1.5.102.1.1) | 19       | 2023-06-21/<br>2023-07-31 | 2023-06-14<br>(2023-06-06/2023-06-20) | 0.83        | NA (0.93)         |
|                        | JD.1.2<br>(XBB.1.5.102.1.2) | 45       | 2023-03-11/<br>2023-07-31 | 2023-03-09<br>(2023-03-04/2023-03-10) | 0.90        | BR (1.0)          |

The table details the space-time dynamics of autochthonous XBB\* Brazilian lineages and their descendants. For better comprehension of their ancestry, selected lineages have been partially aliased. All lineages are accompanied by (i) the number of sequences in the phylogeographic reconstruction; (ii) sampling range; (iii) T<sub>MRCA</sub> and corresponding 95% HPD; (iv) statistical support (aLRT) in the original maximum likelihood topology; (v) most probable location of their MRCA, and its statistical support (PSP). NA: North America, BR: Brazil.

## COVID-19 FIOCRUZ GENOMIC SURVEILLANCE NETWORK MEMBERS

### FIOCRUZ PERNAMBUCO

#### *Instituto Aggeu Magalhães*

Gabriel da Luz Wallau  
Marcelo Henrique Santos Paiva  
Roberto Dias Lins Neto  
Cassia Docena  
Matheus Filgueira Bezerra  
Alexandre Freitas da Silva  
Danilo Fernandes Coêlho  
Duschinka Ribeiro Duarte Guedes  
Emerson Gonçalves Moreira  
Filipe Zimmer Dezordi  
Gustavo Barbosa de Lima  
Isabelle Freire Viana  
Lais Ceschini Machado  
Lilian Caroliny Amorim Silva  
Marcus André Molinero  
Matheus Vitor Ferreira Ferraz  
Raul Emidio de Lima  
Tayná Evily de Lima  
Tulio de Lima Campos  
Wenny Camilla dos Santos Adan

### FIOCRUZ BAHIA

#### *Instituto Gonçalo Moniz*

Antônio Ricardo Khouri Cunha  
Bruno de Bezerril Andrade  
Bruno Solano de Freitas Souza  
Camila Indiani de Oliveira  
Clarissa Araújo Gurgel Rocha  
Isadora Cristina de Siqueira  
Leonardo Paiva Farias  
Vanessa Leiko Oikawa Cardoso

### FIOCRUZ RIO DE JANEIRO

#### *Instituto Oswaldo Cruz*

#### *Laboratório de Vírus Respiratórios, Exantemáticos, Enterovírus e Emergências Virais*

Marilda Teixeira de Siqueira  
Paola Cristina Resende Silva  
Fernando do Couto Motta  
Alice Sampaio Barreto da Rocha  
Bruna Mendonça da Silva  
Edson Elias da Silva  
Elisa Cavalcante Pereira  
Gabriela Calegario  
Jéssica Graça de Macedo Carvalho  
Larissa Macedo Pinto  
Leonardo Saboia Vahia Matilde  
Lucas Freitas  
Luciana Appolinario  
Renata Serrano Lopes  
Victor Guimarães Ribeiro

#### *Laboratório de Arbovírus e Vírus Hemorrágicos*

Ana Maria Bispo de Filippis  
Felipe Gomes Naveca  
Gonzalo Bello  
Marcos César Lima de Mendonça  
Ighor Leonardo Arantes Gomes

#### *Laboratório de Genômica Funcional e Bioinformática*

Wim M. S. Degrave

#### **Plataforma Genômica**

Aline dos Santos Moreira  
Alexandre Cunha dos Santos  
Audrien Alves Andrade de Souza  
Beatriz de Lima Alessio Müller  
Camila Castanon Freire Barraca  
Marília Alves Figueira de Melo

#### **Plataforma de Bioinformática**

Thiago Estevam Parente  
Rafael Ferreira Soares  
Daniel Andrade Moreira

### FIOCRUZ AMAZÔNIA

#### *Instituto Leônidas e Maria Deane*

Felipe Gomes Naveca  
André de Lima Guerra Corado  
Fernanda Oliveira do Nascimento  
George Allan Villarouco da Silva  
Karina Pinheiro Pessoa  
Luciana Mara Fé Gonçalves  
Maria Julia Pessoa Brandão  
Matilde Contreras Mejia  
Valdinete Alves do Nascimento  
Victor Costa de Souza

#### *Instituto Nacional de Controle de Qualidade em Saúde*

Maysa Mandetta Clementino  
Andressa Silva Gonçalves de Brito  
Beatriz Oliveira de Farias  
Ivano Victorio de Filippis Capasso  
Kayo Cesar Bianco Fernandes  
Mariana Magaldi de Souza Lima

### FIOCRUZ MINAS GERAIS

#### *Instituto René Rachou*

Pedro Augusto Alves  
Gabriel da Rocha Fernandes  
Anna Christina de Matos Salim  
Carlos Eduardo Calzavara Silva  
Caroline Penido Rocha  
Flávio Marcos Gomes de Araújo  
Rubens Lima do Monte Neto  
Thaís Bárbara de Souza Silva

### FIOCRUZ RONDÔNIA

Deusilene Souza Vieira Dall'Acqua  
Jackson Alves da Silva Queiroz  
Ana Maisa Passos da Silva  
Jessiane Rodrigues Ribeiro

### FIOCRUZ CEARÁ

Fabio Miyajima  
Fernando Braga Stehling Dias  
Alice Di Sabatino Guilmarães  
Antonio Lucas Delerino  
Carlos Leonardo de Aragão Araújo  
Cecília Leite Costa

Cleber Furtado Aksenen  
Eduardo Ruback dos Santos  
Igor Oliveira Duarte  
Jamille Maria Mendes Bezerra  
Joaquim Sousa Junior  
Marcela Helena Gambim Fonseca  
Nicole Silva França  
Pedro Miguel Carneiro Jeronimo  
Suzana Porto Almeida  
Thais de Oliveira Costa  
Thaís Ferreira de Oliveira  
Ticiane Cavalcante de Souza  
Veridiana Pessoa Miyajim

#### **VICE-PRESIDÊNCIA DE ENSINO, INFORMAÇÃO E COMUNICAÇÃO**

Marcelo Ferreira da Costa Gomes  
Antonio Fonseca Pacheco  
Claudia Torres Codeço  
Daniel Antunes Maciel Villela  
Leonardo Soares Bastos  
Raquel Martins Lana

### FIOCRUZ PIAUÍ

Vladimir Costa Silva  
Adelino Soares Lima Neto  
Carlos Henrique Nery Costa  
Hérica Jayne de Oliveira Amaral  
Jacenir Reis dos Santos Mallet  
Walterlene de Carvalho Gonçalves

### FIOCRUZ PARANÁ

#### *Instituto Carlos Chagas*

Helisson Faoro  
Tiago Gräf  
Andrea Rodrigues Avila  
Andréia Akemi Suzukawa  
Bruno Dallagiovanna  
Eduardo Balsanelli  
Emanuel Maltempi de Souza  
Fabio de Oliveira Pedrosa  
Fabio Passetti  
Fabricio Kleryton Marchini  
Hellen Geremias dos Santos  
Luis Gustavo Morello  
Mauro Medeiros de Oliveira  
Michelle Orane Schemberger  
Valter Antonio de Baura  
Wagner Nagib

### FIOCRUZ MATO GROSSO DO SUL

Alexsandra Mendonça Favacho  
Zoraida Fernandez Grillo  
Daniel Máximo Corrêa Alcântara  
Thiago Fernandes de Oliveira

#### **VICE-PRESIDÊNCIA E DE PESQUISA E COLEÇÕES BIOLÓGICAS**

Rodrigo Correa de Oliveira  
Bruno de Sousa Moraes  
Cristiane Elisa Boar
